# Supplementary material for: Matrix Metalloproteinases MMP-2 and MMP-9, Their Inhibitors TIMP-1 and TIMP-2, Vascular Endothelial Growth Factor and sVEGFR-2 as Predictive Markers of Ischemic Retinopathy in Patients with Systemic Sclerosis—Case Series Report
Source: MDPI journal article supplement (doi:10.3390/ijms21228703), 2020-11-18
Supplement: s1 [file s1]

**Supplementary Table S1.** Calculation of TIMP and MMP molecular weights for stoichiometric analysis.

| Protein  | UniProtKB ID | AAs     | MW (Da)  |
|----------|--------------|---------|----------|
| TIMP1    | P01033       | 24-207  | 20 708.8 |
| TIMP2    | P16035       | 27-220  | 21755.0  |
| MMP1     | P03956       | 20-469  | 51844.2  |
| MMP2     | P08253       | 30-660  | 70975.7  |
| MMP9     | P14780       | 20-707  | 76370.5  |
| VEGFA    | P15692       | 27-232  | 23894.62 |
| sVEGFR-2 | P35968       | 20-1356 | 20708.83 |

Molecular weight (MW) given in Daltons (Da) was calculated using the amino acid sequence (AAs) stated (signal peptide sequence removed), retrieved from the UniProt database.

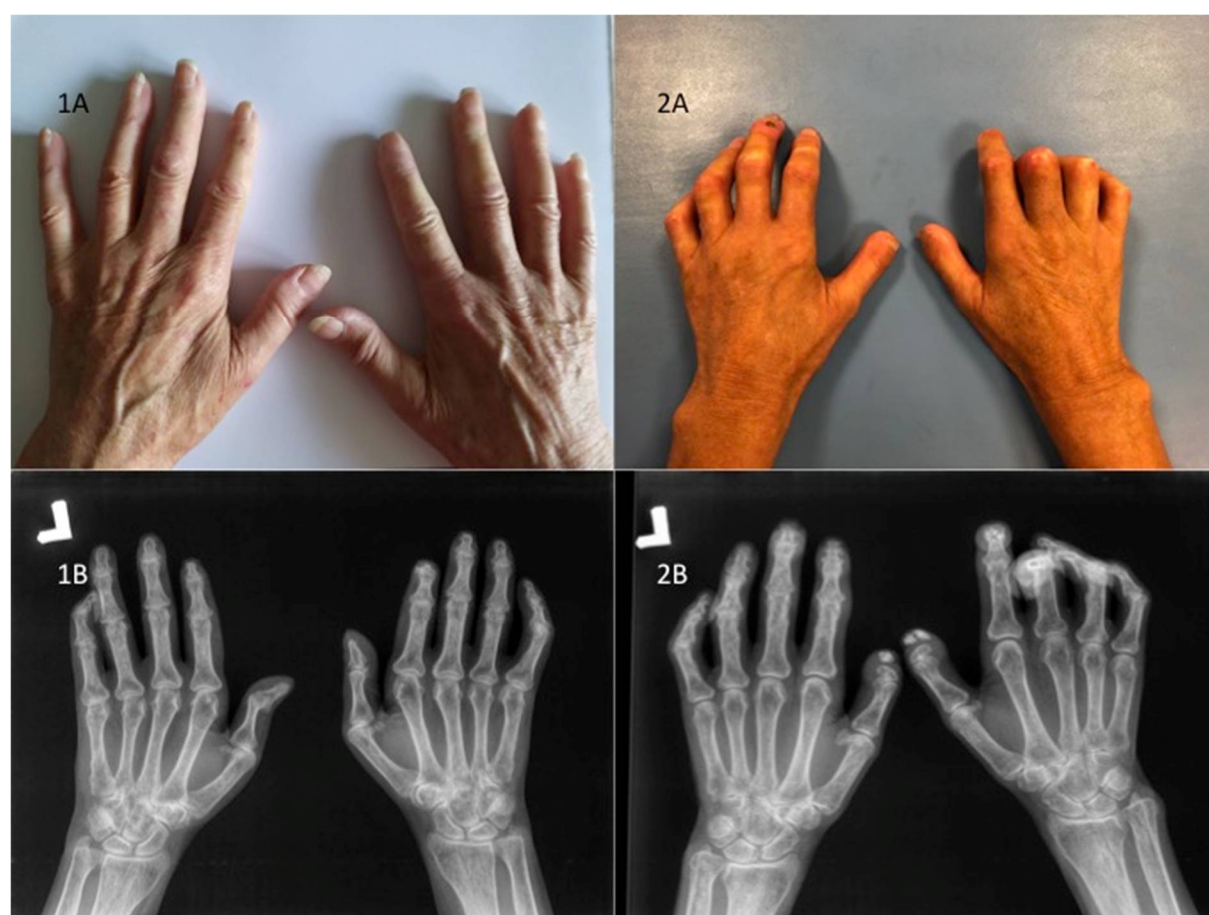

**Supplementary Figure S1.** Clinical and radiological pictures of Patients 1 and 2 hands with characteristic appearance of sclerodactylia.

**Patient 1.** In the orthopaedic examination we have found pathological changes in the both hands manifested with thickening of the skin and subcutaneous tissue. The palpable fibrosis of the palmar apponeurosis and flexores muscles tendons of the fingers as well as moderate swelling of proximal

interphalangeal joints (PIP) of 2<sup>nd</sup>-4<sup>th</sup> fingers of both hands were also seen (**1A**). The physical examination also revealed limited extension in proximal and distal interphalangeal joints (PIP, DIP) of 3<sup>rd</sup>-5<sup>th</sup> fingers of the right hand, limited extension in distal interphalangeal joints (DIP) of 3<sup>rd</sup>-4<sup>th</sup> fingers of the left hand and slight flexion in metacarpophalangeal joints (MCP) (**1A**). The limited abduction of the thumbs of both hands was also seen. The digital ulcers (DU) of fingertips of the 2<sup>nd</sup> and 3<sup>th</sup> finger of the right hand were also seen (**1A**). The x-ray examination of the hands revealed resorption of 2<sup>nd</sup> distal phalanx of right hand, joint space narrowing of MCP, PIP and DIP joints of the fingers, erosions and juxta-articular osteopenia (**1B**)

**Patient 2.** In the orthopedic examination we have found pathological changes in the both hands manifested with thickening of the skin and subcutaneous tissue. The palpable fibrosis of the palmar apponeurosis and flexoris muscles tendons of the fingers were also seen. These changes resulted in limited extension in proximal and distal interphalangeal joints (PIP, DIP) and flexion in metacarpophalangeal joints (MCP), which led to claw-type deformity of the fingers, specially of 3<sup>rd</sup>, 4<sup>th</sup> and 5<sup>th</sup> finger of the right hand and 4<sup>th</sup> and 5<sup>th</sup> finger of the left hand (**2A**). The digital ulcers (DU) of the 3<sup>th</sup> finger of the left hand were also seen (**2A**). The x-ray examination of the hands revealed resorption of bilateral 1<sup>st</sup>, 2<sup>nd</sup> and 3<sup>rd</sup> distal phalanxes, joint space narrowing of MCP, PIP and DIP joints of the fingers, erosions, juxta-articular osteopenia, acro-osteolysis of the distal phalanxes of the thumbs and calcinosis of the first fingertips (**2B**).
